# Supplementary material for: First Insights into the Subterranean Crustacean Bathynellacea Transcriptome: Transcriptionally Reduced Opsin Repertoire and Evidence of Conserved Homeostasis Regulatory Mechanisms
Source: PLoS One. 2017 Jan 20;12(1):e0170424. doi: 10.1371/journal.pone.0170424 (PMC5249073; doi:10.1371/journal.pone.0170424)
Supplement: S8 Table — (XLSX) [file pone.0170424.s011.xlsx]

## Sheet: S8 Table
SeqName	Subfamily	Description (NR BLAST annotation)	RPKM
Allo_16723	10	heat shock 10	58.1349
Allo_21909	10	heat shock 10	0
Allo_48405	20	small heat shock	112.327
Allo_49057	20	heat shock 21	8.16707
Allo_50850	20	heat shock 21	13.589
Allo_58978	22	heat shock 21	25.2279
Allo_39087	23	heat shock 27	0
Allo_40437	23	heat shock 27	0
Allo_14916	27	heat shock 27	0
Allo_16170	27	small heat shock 21	1.01274
Allo_33045	27	heat shock 27	2.08533
Allo_62660	27	heat shock 27	0
Allo_65084	27	heat shock 27	0
Allo_71013	40	heat shock 40	0.580427
Allo_24520	40	heat shock 40	0.14469
Allo_29640	40	heat shock 40	2.94265
Allo_64045	40	heat shock 40	0
Allo_71101	40	heat shock 40	0
Allo_03948	40	(Hsp40) homolog, subfamily C, member 5 gamma, isoform CRA_a	11.4897
Allo_44716	40	heat shock 40	22.0809
Allo_16706	60	heat shock 60	0
Allo_23724	60	heat shock 60	0
Allo_63400	60	heat shock 60	0
Allo_65367	60	heat shock 60	0
Allo_70964	60	heat shock 60	3.72289
Allo_03366	70	HSP70	0
Allo_14682	70	heat shock 70	0.0810822
Allo_16576	70	hsp70-binding 1-like	15.2502
Allo_61544	70	heat shock 70 kDa	4.22863
Allo_63405	70	heat shock 70	0
Allo_64793	70	70 kDa heat shock form 3	0
Allo_73673	70	heat shock 70 kDa	0
Allo_01421	70	hsp70 protein	1.06686
Allo_08820	70	heat shock 70 kDa	0.869161
Allo_10735	70	HSP70	0
Allo_20824	70	heat shock 70 kDa	0.0878744
Allo_21503	70	70 kDa heat shock form 2	4.55791
Allo_22985	70	heat shock 70 kDa	11.8427
Allo_38065	70	heat shock 70 kDa	0
Allo_56159	70	heat shock 70 kDa	0
Allo_65457	70	heat shock 70 kDa	0
Allo_65921	70	HSP70	0
Allo_66311	70	heat shock 70 kDa	0
Allo_24969	90	heat shock HSP 90-beta-like	7.3176
Allo_47791	90	heat shock 90	0
Allo_18243	90	heat shock 90	0
Allo_68600	97	97 kDa heat shock -like	0
Allo_21474	97	97 kDa heat shock -like	0.459836
